# Supplementary material
Source: PubMed Central journal article supplement (PMC2846161)
Supplement: ddq025_1.pdf [file ddq025_1.pdf]

**Supplemental Figure 1: Network 1 showing confident interactions**

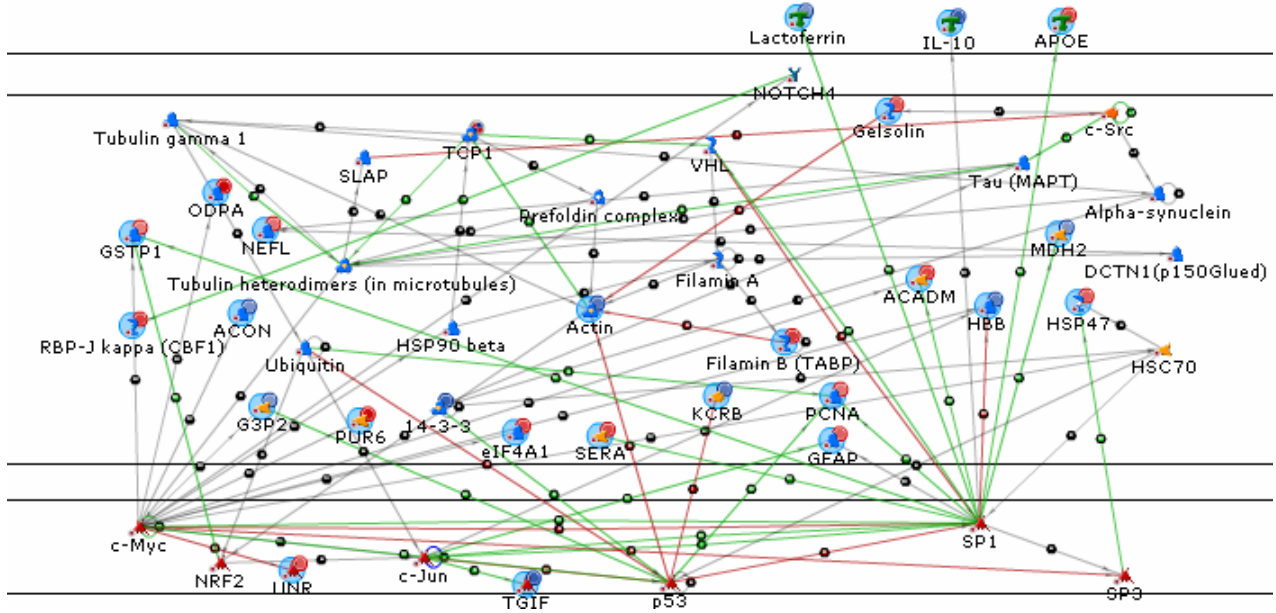

**Supplemental Figure 2: Network 2 showing confident interactions**

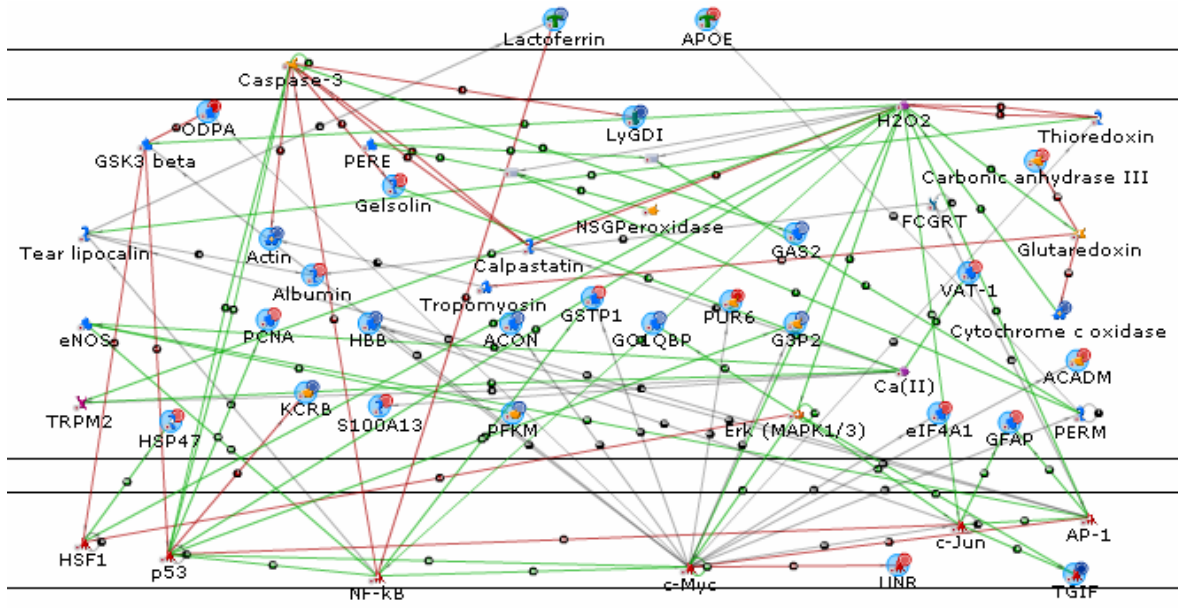

**Supplemental Figure 3: Network 3 showing confident interactions**

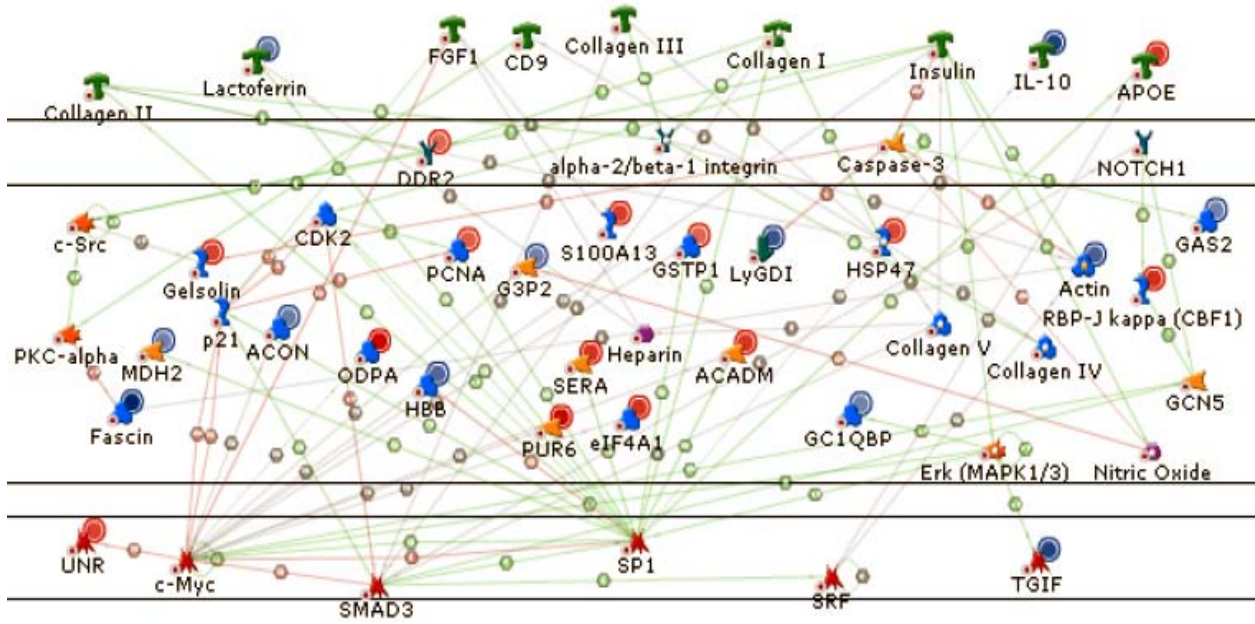

**Supplemental Figure 4: Network 4 showing confident interactions**

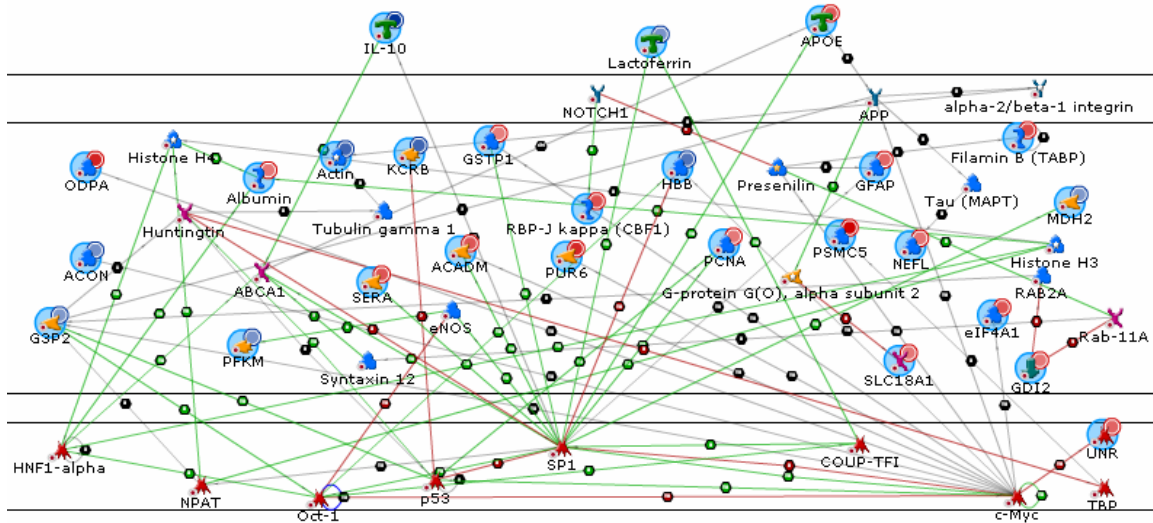

**Supplemental Table 1: List of differentially expressed proteins**

| Spot No. | T-test | Av. Ratio<br>MT/WT | GI #     | Protein name                                     | Protein Probability | Peptide (Coverage %) |
|----------|--------|--------------------|----------|--------------------------------------------------|---------------------|----------------------|
| 173      | 0.0082 | 1.46               | 28916693 | gelsolin                                         | 6.7E-13             | 10 (16)              |
|          |        |                    | 21450287 | upstream of NRAS                                 | 3.4E-10             | 14 (20)              |
| 186      | 0.026  | 1.23               | 28916693 | gelsolin                                         | 1.1E-15             | 17 (29)              |
|          |        |                    | 33859506 | albumin 1                                        | 3.4E-11             | 33 (48)              |
| 187      | 0.037  | 1.31               | 28916693 | gelsolin                                         | 5.2E-14             | 17 (31)              |
| 205      | 0.012  | -1.16              | 18079339 | aconitase 2, mitochondrial                       | 1.6E-12             | 25 (36)              |
| 206      | 0.02   | -1.15              | 31560677 | lactotransferrin                                 | 5.7E-12             | 12 (19)              |
|          |        |                    | 31981185 | phosphofructokinase, muscle                      | 2.6E-11             | 11 (16)              |
|          |        |                    | 18079339 | aconitase 2, mitochondrial                       | 9.4E-11             | 37 (53)              |
| 436      | 0.016  | 1.12               | 6678359  | transketolase                                    | 1.0E-30             | 20 (47)              |
|          |        |                    | 33667042 | heterogeneous nuclear ribonucleoprot             | 5.2E-11             | 8 (17)               |
| 510      | 0.0072 | 1.27               | 7305565  | t-complex protein 1                              | 2.0E-12             | 7 (15)               |
|          |        |                    | 12963757 | myo-inositol 1-phosphate synthase A1             | 3.00E-10            | 11 (21)              |
| 522      | 0.0047 | 1.52               | 12963757 | myo-inositol 1-phosphate synthase A1             | 7.30E-10            | 11 (24)              |
| 599      | 0.0057 | 1.2                | 6679687  | glucose regulated protein                        | 4.00E-09            | 11 (25)              |
| 709      | 0.0052 | 1.17               | 31981273 | CNDP dipeptidase 2 (metallopeptidase             | 1.50E-11            | 19 (50)              |
| 715      | 0.0017 | -1.13              | 6679745  | fascin homolog 1, actin bundling prot            | 6.40E-12            | 12 (32)              |
| 723      | 0.099  | -1.7               | 6679745  | fascin homolog 1, actin bundling prot            | 4.20E-10            | 6 (16)               |
|          |        |                    | 6677981  | vacuolar protein sorting 4b                      | 1.30E-08            | 6 (17)               |
|          |        |                    | 6671700  | chaperonin subunit 2 (beta)                      | 5.60E-08            | 4 (13)               |
| 743      | 0.0078 | -1.21              | 31980648 | ATP synthase, H <sup>+</sup> transporting mitoch | 5.10E-10            | 23 (44)              |
| 810      | 0.045  | 1.41               | 26080422 | glial fibrillary acidic protein                  | 3.60E-10            | 14 (35)              |
|          |        |                    | 19527048 | heterogeneous nuclear ribonucleoprot             | 7.30E-08            | 4 (10)               |
|          |        |                    | 30794476 | protein kinase, cAMP dependent regul             | 7.20E-07            | 5 (19)               |
| 861      | 0.014  | 1.23               | 56119103 | guanosine diphosphate (GDP) dissocia             | 2.50E-13            | 22 (51)              |

|      |          |       |          |                                       |          |         |
|------|----------|-------|----------|---------------------------------------|----------|---------|
|      |          |       | 33859662 | vesicle amine transport protein 1 ho  | 7.10E-11 | 7 (22)  |
| 894  | 0.008    | 1.62  | 21450625 | eukaryotic translation initiation fa  | 1.00E-09 | 3 (10)  |
| 907  | 0.0094   | 1.28  | 8393866  | ornithine aminotransferase            | 9.00E-11 | 7 (21)  |
| 912  | 0.0046   | 1.32  | 38198665 | p47 protein                           | 2.0E-06  | 1 (4)   |
| 917  | 0.0054   | 1.21  | 8393866  | ornithine aminotransferase            | 9.6E-12  | 11 (22) |
| 939  | 0.0097   | 1.61  | 63518159 | PREDICTED: phosphogluconate dehydrog  | 1.0E-12  | 4 (11)  |
|      |          |       | 6680956  | coagulation factor C homolog (Limulus | 1.1E-12  | 13 (28) |
| 942  | 0.0027   | 1.51  | 63518159 | PREDICTED: phosphogluconate dehydrog  | 5.6E-12  | 2 (5)   |
|      |          |       | 6680956  | coagulation factor C homolog (Limulus | 1.6E-11  | 14 (24) |
|      |          |       | 7305363  | platelet-activating factor acetylhydr | 2.0E-10  | 12 (30) |
| 945  | 0.00084  | 1.73  | 6680956  | coagulation factor C homolog (Limulus | 1.3E-11  | 16 (28) |
|      |          |       | 33859554 | fumarate hydratase 1                  | 1.1E-08  | 4 (12)  |
| 947  | 0.00018  | 1.44  | 6679261  | pyruvate dehydrogenase E1 alpha 1     | 2.4E-14  | 22 (52) |
|      |          |       | 6680956  | coagulation factor C homolog (Limulus | 3.0E-13  | 26 (54) |
| 962  | 0.0014   | 1.32  | 33859554 | fumarate hydratase 1                  | 8.9E-15  | 19 (37) |
|      |          |       | 6680956  | coagulation factor C homolog (Limulus | 1.8E-14  | 25 (51) |
| 969  | 0.01     | 1.4   | 33859554 | fumarate hydratase 1                  | 1.0E-15  | 22 (40) |
|      |          |       | 6753304  | serine (or cysteine) proteinase inhib | 2.0E-15  | 9 (9)   |
| 985  | 0.0053   | -1.31 | 10946574 | creatine kinase, brain                | 6.3E-13  | 17 (46) |
|      |          |       | 6753416  | chitinase 3-like 3                    | 8.5E-11  | 19 (51) |
|      |          |       | 46593021 | ubiquinol-cytochrome c reductase cor  | 6.8E-10  | 5 (11)  |
|      |          |       | 6671509  | actin, beta, cytoplasmic              | 2.6E-08  | 9 (24)  |
| 991  | 0.0008   | 2.55  | 6680956  | coagulation factor C homolog (Limulus | 1.1E-16  | 29 (56) |
|      |          |       | 7110703  | protease (prosome, macropain) 26S sub | 8.3E-12  | 12 (32) |
| 992  | 0.00023  | 1.69  | 6680956  | coagulation factor C homolog (Limulus | 2.0E-15  | 23 (46) |
| 995  | 3.10E-05 | 2.18  | 6680956  | coagulation factor C homolog (Limulus | 1.0E-30  | 23 (40) |
|      |          |       | 6679261  | pyruvate dehydrogenase E1 alpha 1     | 1.0E-30  | 9 (23)  |
| 1002 | 0.013    | 1.91  | 6680956  | coagulation factor C homolog (Limulus | 2.0E-13  | 27 (59) |

|      |         |       |          |                                       |         |         |
|------|---------|-------|----------|---------------------------------------|---------|---------|
|      |         |       | 21313144 | GTP-binding protein PTD004            | 6.0E-11 | 12 (33) |
|      |         |       | 6753428  | creatine kinase, mitochondrial 1, ubi | 2.9E-10 | 13 (35) |
| 1004 | 0.0012  | 2.22  | 7110703  | protease (prosome, macropain) 26S sub | 5.9E-14 | 24 (19) |
|      |         |       | 6753476  | cyclic nucleotide phosphodiesterase 1 | 4.9E-13 | 6 (17)  |
|      |         |       | 51766806 | PREDICTED: similar to Pgk1 protein    | 1.9E-12 | 7 (11)  |
| 1005 | 0.019   | 1.72  | 6680956  | coagulation factor C homolog (Limulus | 9.0E-15 | 21 (43) |
|      |         |       | 51766806 | PREDICTED: similar to Pgk1 protein    | 2.0E-10 | 15 (42) |
| 1010 | 0.032   | 1.53  | 6680956  | coagulation factor C homolog (Limulus | 2.7E-14 | 18 (35) |
| 1011 | 0.0031  | 1.68  | 6680956  | coagulation factor C homolog (Limulus | 4.2E-11 | 10 (26) |
|      |         |       | 13386272 | citrate synthase-like protein         | 1.4E-10 | 2 (5)   |
| 1019 | 0.00093 | 2.12  | 7110703  | protease (prosome, macropain) 26S sub | 5.5E-13 | 24 (52) |
|      |         |       | 6680956  | coagulation factor C homolog (Limulus | 2.1E-12 | 15 (36) |
|      |         |       | 13385434 | phosphoribosylaminoimidazole carboxy  | 4.0E-10 | 10 (26) |
|      |         |       | 6679261  | pyruvate dehydrogenase E1 alpha 1     | 1.9E-09 | 12 (31) |
| 1039 | 0.045   | 1.89  | 51766806 | PREDICTED: similar to Pgk1 protein    | 3.3E-15 | 19 (58) |
|      |         |       | 6680956  | coagulation factor C homolog (Limulus | 1.1E-14 | 11 (28) |
| 1042 | 0.013   | 1.47  | 6680956  | coagulation factor C homolog (Limulus | 4.4E-15 | 9 (22)  |
|      |         |       | 51766806 | PREDICTED: similar to Pgk1 protein    | 4.8E-11 | 14 (43) |
| 1065 | 0.0027  | -1.16 | 1338474  | aminoacylase 1                        | 5.8E-14 | 17 (48) |
|      |         |       | 6754816  | septin 2                              | 2.2E-12 | 7 (18)  |
| 1087 | 0.052   | 1.6   | 51766806 | PREDICTED: similar to Pgk1 protein    | 1.1E-15 | 21 (62) |
|      |         |       | 6680618  | acetyl-Coenzyme A dehydrogenase, medi | 4.3E-14 | 4 (16)  |
|      |         |       | 6680956  | coagulation factor C homolog (Limulus | 7.3E-14 | 21 (44) |
| 1100 | 0.015   | 1.26  | 31543747 | spermine synthase                     | 1.8E-09 | 8 (28)  |
|      |         |       | 26080422 | glial fibrillary acidic protein       | 9.2E-09 | 10 (23) |
|      |         |       | 39204499 | neurofilament, light polypeptide      | 1.1E-08 | 6 (10)  |
| 1106 | 0.048   | -1.59 | 6680956  | coagulation factor C homolog (Limulus | 4.2E-11 | 17 (33) |
| 1112 | 0.0068  | -1.12 | 51890205 | succinate-Coenzyme A ligase, GDP-for  | 6.3E-11 | 8 (27)  |

|      |        |       |          |                                                    |          |         |
|------|--------|-------|----------|----------------------------------------------------|----------|---------|
| 1113 | 0.0089 | -1.54 | 6680956  | coagulation factor C homolog (Limulus              | 3.3E-12  | 17 (33) |
|      |        |       | 9789985  | isovaleryl coenzyme A dehydrogenase                | 1.8E-10  | 10 (28) |
| 1114 | 0.015  | -1.57 | 6680956  | coagulation factor C homolog (Limulus              | 1.9E-13  | 19 (38) |
| 1127 | 0.015  | -1.58 | 6680956  | coagulation factor C homolog (Limulus              | 1.3E-12  | 17 (31) |
| 1138 | 0.021  | -1.17 | 51766806 | PREDICTED: similar to Pgk1 protein                 | 1.00E-15 | 11 (32) |
|      |        |       | 22267442 | ubiquinol cytochrome c reductase cor               | 3.00E-15 | 22 (49) |
| 1166 | 0.0069 | -1.29 | 6671507  | actin, alpha 2, smooth muscle, aorta               | 6.40E-11 | 7 (22)  |
|      |        |       | 6679022  | neutrophil cytosolic factor 4                      | 5.60E-10 | 9 (34)  |
| 1212 | 0.0024 | -1.12 | 13195624 | NADH dehydrogenase (ubiquinone) 1 alpha subcomplex | 4.00E-12 | 19(48)  |
| 1248 | 0.027  | 1.18  | 33859801 | F-box only protein 2                               | 1.20E-12 | 7 (37)  |
| 1329 | 0.032  | -1.42 | 6678674  | lactate dehydrogenase 2, B chain                   | 1.60E-11 | 13 (48) |
| 1356 | 0.0073 | -1.17 | 18152793 | pyruvate dehydrogenase (lipoamide) b               | 5.60E-15 | 20 (53) |
|      |        |       | 6680045  | guanine nucleotide-binding protein, b              | 7.90E-11 | 6 (25)  |
| 1415 | 0.01   | -1.13 | 31982186 | malate dehydrogenase 2, NAD (mitocho               | 2.00E-15 | 20 (63) |
|      |        |       | 6679943  | growth arrest specific 2                           | 2.00E-12 | 12 (45) |
|      |        |       | 47607490 | glyceraldehyde-3-phosphate dehydr                  | 3.00E-11 | 4 (18)  |
| 1434 | 0.0027 | 1.22  | 6753060  | annexin A5                                         | 3.20E-14 | 17 (59) |
|      |        |       | 19527388 | OTU domain, ubiquitin aldehyde bindi               | 4.10E-12 | 4 (19)  |
|      |        |       | 7242171  | proliferating cell nuclear antigen                 | 9.30E-12 | 21 (67) |
| 1451 | 0.0011 | 1.48  | 6753060  | annexin A5                                         | 4.8E-12  | 4 (16)  |
|      |        |       | 54287684 | eukaryotic translation elongation fa               | 2.0E-08  | 4 (19)  |
| 1454 | 0.0077 | 1.39  | 6753060  | annexin A5                                         | 2.0E-10  | 18 (53) |
| 1458 | 0.0024 | 1.59  | 6753102  | apolipoprotein E                                   | 2.6E-07  | 3 (15)  |
| 1460 | 0.0055 | 1.33  | 6753060  | annexin A5                                         | 1.4E-11  | 8 (18)  |
|      |        |       | 1952738  | OTU domain, ubiquitin aldehyde bindi               | 1.1E-09  | 6 (28)  |
| 1485 | 0.022  | 1.19  | 6753060  | annexin A5                                         | 5.0E-11  | 15 (56) |
| 1488 | 0.013  | -1.48 | 31982825 | TG-interacting factor                              | 8.8E-04  | 1 (8)   |
| 1595 | 0.009  | -1.12 | 6680816  | complement component 1, q subcomponen              | 6.7E-15  | 6 (25)  |

|      |        |       |          |                                       |          |         |
|------|--------|-------|----------|---------------------------------------|----------|---------|
| 1652 | 0.0053 | -1.6  | 34098931 | calbindin 2                           | 1.8E-10  | 13 (49) |
| 1654 | 0.025  | -1.45 | 34098931 | calbindin 2                           | 6.10E-11 | 18(59)  |
|      |        |       | 6756039  | tyrosine 3-monooxygenase/tryptophan 5 | 1.00E-10 | 2(18)   |
|      |        |       | 31543976 | 3-monooxygenase/tryptophan 5-monooxyg | 5.54E-10 | 4(17)   |
| 1655 | 0.033  | -1.37 | 33563236 | Rho, GDP dissociation inhibitor (GDI) | 2.00E-13 | 12(58)  |
|      |        |       | 31982030 | Rho GDP dissociation inhibitor (GDI)  | 8.25E-11 | 2(12)   |
| 1698 | 0.017  | 1.31  | 31982861 | carbonic anhydrase 3                  | 1.5E-10  | 12 (67) |
| 1869 | 0.0062 | 1.13  | 10092608 | glutathione S-transferase, pi         | 2.9E-13  | 14(54)  |
|      |        |       | 32401425 | glutathione S-transferase, pi         | 2.9E-13  | 9(40)   |
| 2067 | 0.0038 | -1.13 | 19482160 | coactosin-like 1                      | 1.3E-06  | 4(20)   |
| 2109 | 0.037  | -1.31 | 6680986  | cytochrome c oxidase, subunit Va      | 2.0E-09  | 4 (30)  |
| 2149 | 0.0065 | -1.26 | 5176389  | PREDICTED: similar to Hemoglobin bet  | 2.0E-12  | 8 (65)  |
|      |        |       | 31982300 | hemoglobin, beta adult major chain    | 2.0E-12  | 7 (56)  |
| 2175 | 0.0031 | 1.51  | 6677835  | S100 calcium binding protein A13      | 2.0E-06  | 2 (20)  |

List of proteins differentially expressed in the cochlea of the *av* mouse compared to controls. The table includes spot number from the gel, significance (t-test), fold change expressed as mutant vs. wild-type, genome identifier (gi#), protein name, probability of SEQUEST identification and peptide coverage for the protein of interest.

### Supplemental Table 2: Replicate Cts data for cochlin

| COCH           | AV-3J #1 | AV-3J #2 | AV-3J #3 | NC #1 | NC #2 | NC #3 |
|----------------|----------|----------|----------|-------|-------|-------|
|                | 20.2     | 20       | 19.3     | 20.4  | 19.8  | 19.1  |
|                | 19.9     | 19.8     | 19.1     | 20.1  | 19.8  | 18.9  |
|                | 19.8     | 19.6     | 18.9     | 20    | 19.6  | 18.7  |
| <b>Average</b> | 19.97    | 19.80    | 19.10    | 20.17 | 19.73 | 18.90 |
| <b>STDEV</b>   | 0.21     | 0.20     | 0.20     | 0.21  | 0.12  | 0.20  |
| <b>%CV</b>     | 0.01     | 0.01     | 0.01     | 0.01  | 0.01  | 0.01  |

| GAPDH | AV-3J #1 | AV-3J #2 | AV-3J #3 | NC #1 | NC #2 | NC #3 |
|-------|----------|----------|----------|-------|-------|-------|
|       | 24.2     | 21.9     | 22.7     | 21.3  | 22    | 21.2  |

|                |       |       |       |       |       |       |
|----------------|-------|-------|-------|-------|-------|-------|
|                | 24.1  | 21.7  | 22.2  | 21.3  | 22.2  | 21.2  |
|                | 24.1  | 21.8  | 22.4  | 21.7  | 22    | 20.9  |
| <b>Average</b> | 24.13 | 21.80 | 22.43 | 21.43 | 22.07 | 21.10 |
| <b>STDEV</b>   | 0.06  | 0.10  | 0.25  | 0.23  | 0.12  | 0.17  |
| <b>%CV</b>     | 0.00  | 0.00  | 0.01  | 0.01  | 0.01  | 0.01  |

Replicate Cts data from the qPCR assays involving *Coch*. The Cts (cross-over thresholds) data are shown in the table. A higher Ct value represents lower gene expression. The replicate data points are very tight (little variation), and are therefore very reliable and may be biologically significant. AV-3J represents the strand of *av* mice used in the assays. NC means normal control. STDEV is standard deviation. CV is coefficient of variation. %CV is calculated using the formula STDEV/average.

**Supplemental Table 3: Replicate Cts data for p53, Nrf2, and Brn3a**

| <b>TRP53</b>   | <b>AV-3J #1</b> | <b>AV-3J #2</b> | <b>AV-3J #3</b> | <b>NC #1</b> | <b>NC #2</b> | <b>NC #3</b> |
|----------------|-----------------|-----------------|-----------------|--------------|--------------|--------------|
|                | 27              | 26.7            | 26.7            | 26.6         | 26.7         | 26           |
|                | 26.9            | 26.7            | 26.7            | 26.6         | 26.5         | 25.7         |
|                | 26.7            | 26.6            | 26.5            | 26.5         | 25.8         | 25.5         |
| <b>Average</b> | 26.87           | 26.67           | 26.63           | 26.57        | 26.33        | 25.73        |
| <b>STDEV</b>   | 0.15            | 0.06            | 0.12            | 0.06         | 0.47         | 0.25         |
| <b>%CV</b>     | 0.01            | 0.00            | 0.00            | 0.00         | 0.02         | 0.01         |

| <b>NFE2L2</b>  | <b>AV-3J #1</b> | <b>AV-3J #2</b> | <b>AV-3J #3</b> | <b>NC #1</b> | <b>NC #2</b> | <b>NC #3</b> |
|----------------|-----------------|-----------------|-----------------|--------------|--------------|--------------|
|                | 28.5            | 26.9            | 27.2            | 27           | 26.9         | 26           |
|                | 28.9            | 26.8            | 26.9            | 26.8         | 27           | 26.6         |
|                | 28.8            | 27              | 27.1            | 27.2         | 26.8         | 26.3         |
| <b>Average</b> | 28.73           | 26.90           | 27.07           | 27.00        | 26.90        | 26.30        |
| <b>STDEV</b>   | 0.21            | 0.10            | 0.15            | 0.20         | 0.10         | 0.30         |
| <b>%CV</b>     | 0.01            | 0.00            | 0.01            | 0.01         | 0.00         | 0.01         |

| <b>POU4F1</b>  | <b>AV-3J #1</b> | <b>AV-3J #2</b> | <b>AV-3J #3</b> | <b>NC #1</b> | <b>NC #2</b> | <b>NC #3</b> |
|----------------|-----------------|-----------------|-----------------|--------------|--------------|--------------|
|                | 34.5            | 32.9            | 32.7            | 33.8         | 32.4         | 31.9         |
|                | 33.3            | 32.7            | 33.1            | 33.7         | 33.4         | 31.9         |
|                | 33.7            | 33.1            | 32.9            | 34.1         | 33.7         | 32.2         |
| <b>Average</b> | 33.83           | 32.90           | 32.90           | 33.87        | 33.17        | 32.00        |
| <b>STDEV</b>   | 0.61            | 0.20            | 0.20            | 0.21         | 0.68         | 0.17         |
| <b>%CV</b>     | 0.02            | 0.01            | 0.01            | 0.01         | 0.02         | 0.01         |

| <b>GAPDH</b> | <b>AV-3J #1</b> | <b>AV-3J #2</b> | <b>AV-3J #3</b> | <b>NC #1</b> | <b>NC #2</b> | <b>NC #3</b> |
|--------------|-----------------|-----------------|-----------------|--------------|--------------|--------------|
|--------------|-----------------|-----------------|-----------------|--------------|--------------|--------------|



|                |       |       |       |       |       |       |
|----------------|-------|-------|-------|-------|-------|-------|
|                | 25.7  | 23.5  | 24.1  | 23.7  | 24.1  | 22.9  |
|                | 25.7  | 23.3  | 24.4  | 23.8  | 24.2  | 22.9  |
|                | 26.7  | 23.8  | 24.7  | 24.1  | 24.3  | 23.1  |
| <b>Average</b> | 26.03 | 23.53 | 24.40 | 23.87 | 24.20 | 22.97 |
| <b>STDEV</b>   | 0.58  | 0.25  | 0.30  | 0.21  | 0.10  | 0.12  |
| <b>%CV</b>     | 0.02  | 0.01  | 0.01  | 0.01  | 0.00  | 0.01  |

Replicate Cts data from the qPCR assays involving *Trp53*, *Nfe2l2*, and *Pou4f1*. The Cts (cross-over thresholds) data are shown in the table. A higher Ct value represents lower gene expression. The replicate data points are very tight (little variation), and are therefore very reliable and may be biologically significant. AV-3J represents the strand of *av* mice used in the assays. NC means normal control. STDEV is standard deviation. CV is coefficient of variation. %CV is calculated using the formula STDEV/average.
